# Supplementary material for: Infectivity-Enhanced, Conditionally Replicative Adenovirus for COX-2-Expressing Castration-Resistant Prostate Cancer
Source: MDPI journal article supplement (doi:10.3390/v15040901), 2023-03-31
Supplement: s1 [file s1]

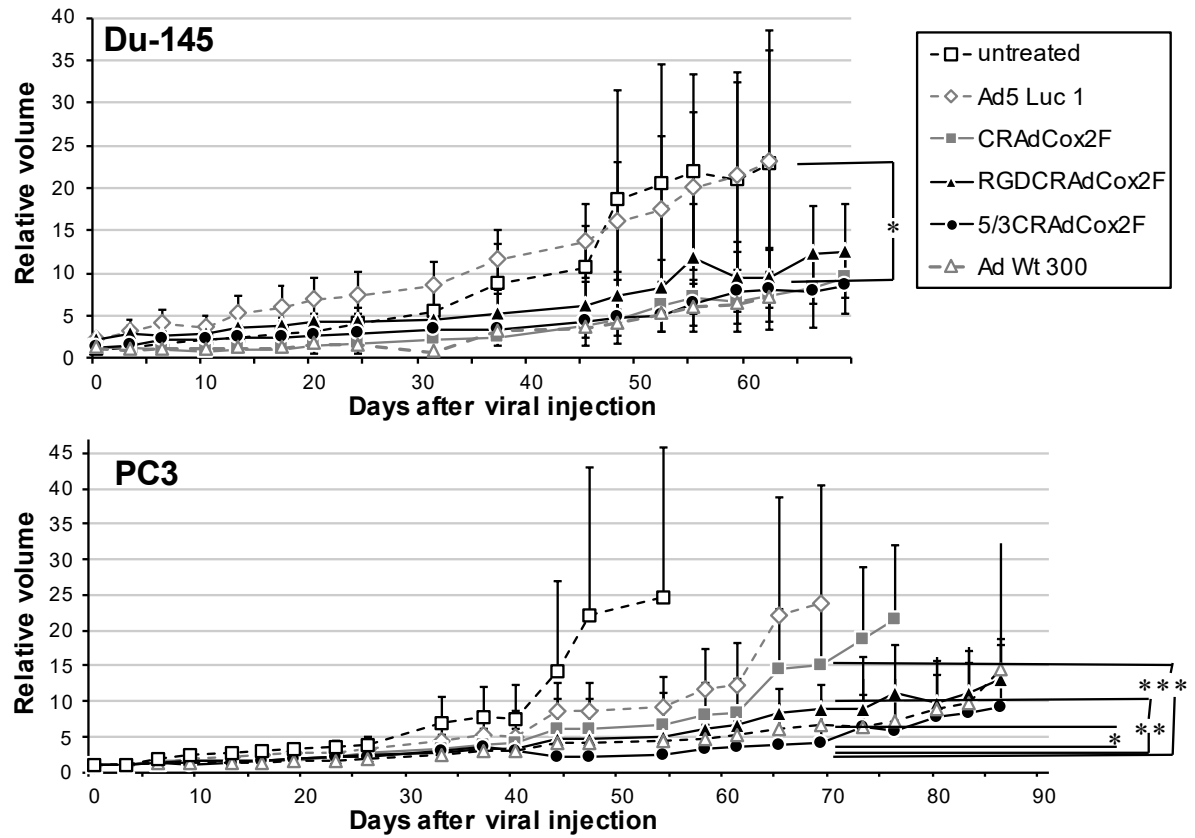

**Supplementary figure S1. In vivo antitumor effect in subcutaneous xenograft model.**

The in vivo antitumor effect of COX-2 CRAbs was analyzed in Du145 and PC-3 hormone-refractory prostate cancer cell lines. The error bars indicate standard deviation. \* $p < 0.05$ , \*\* $p < 0.01$ , \*\*\* $p < 0.005$
